# Supplementary material for: Mechanistic insights into the roles of the UFM1 E3 ligase complex in ufmylation and ribosome-associated protein quality control
Source: PubMed Central journal article supplement — Sci Adv. 2023 Aug 18;9(33):eadh3635. doi: 10.1126/sciadv.adh3635 (PMC10438457; doi:10.1126/sciadv.adh3635), 2023-08-18
Supplement: sciadv.adh3635_sm.pdf [file sciadv.adh3635_sm.pdf]

Supplementary Materials for  
**Mechanistic insights into the roles of the UFM1 E3 ligase complex in  
ufmylation and ribosome-associated protein quality control**

Ryosuke Ishimura *et al.*

Corresponding author: Toshifumi Inada, [toshiinada@ims.u-tokyo.ac.jp](mailto:toshiinada@ims.u-tokyo.ac.jp); Nobuo N. Noda, [nn@igm.hokudai.ac.jp](mailto:nn@igm.hokudai.ac.jp);  
Masaaki Komatsu, [mkomatsu@juntendo.ac.jp](mailto:mkomatsu@juntendo.ac.jp)

*Sci. Adv.* **9**, eadh3635 (2023)  
DOI: 10.1126/sciadv.adh3635

**This PDF file includes:**

Figs. S1 to S7

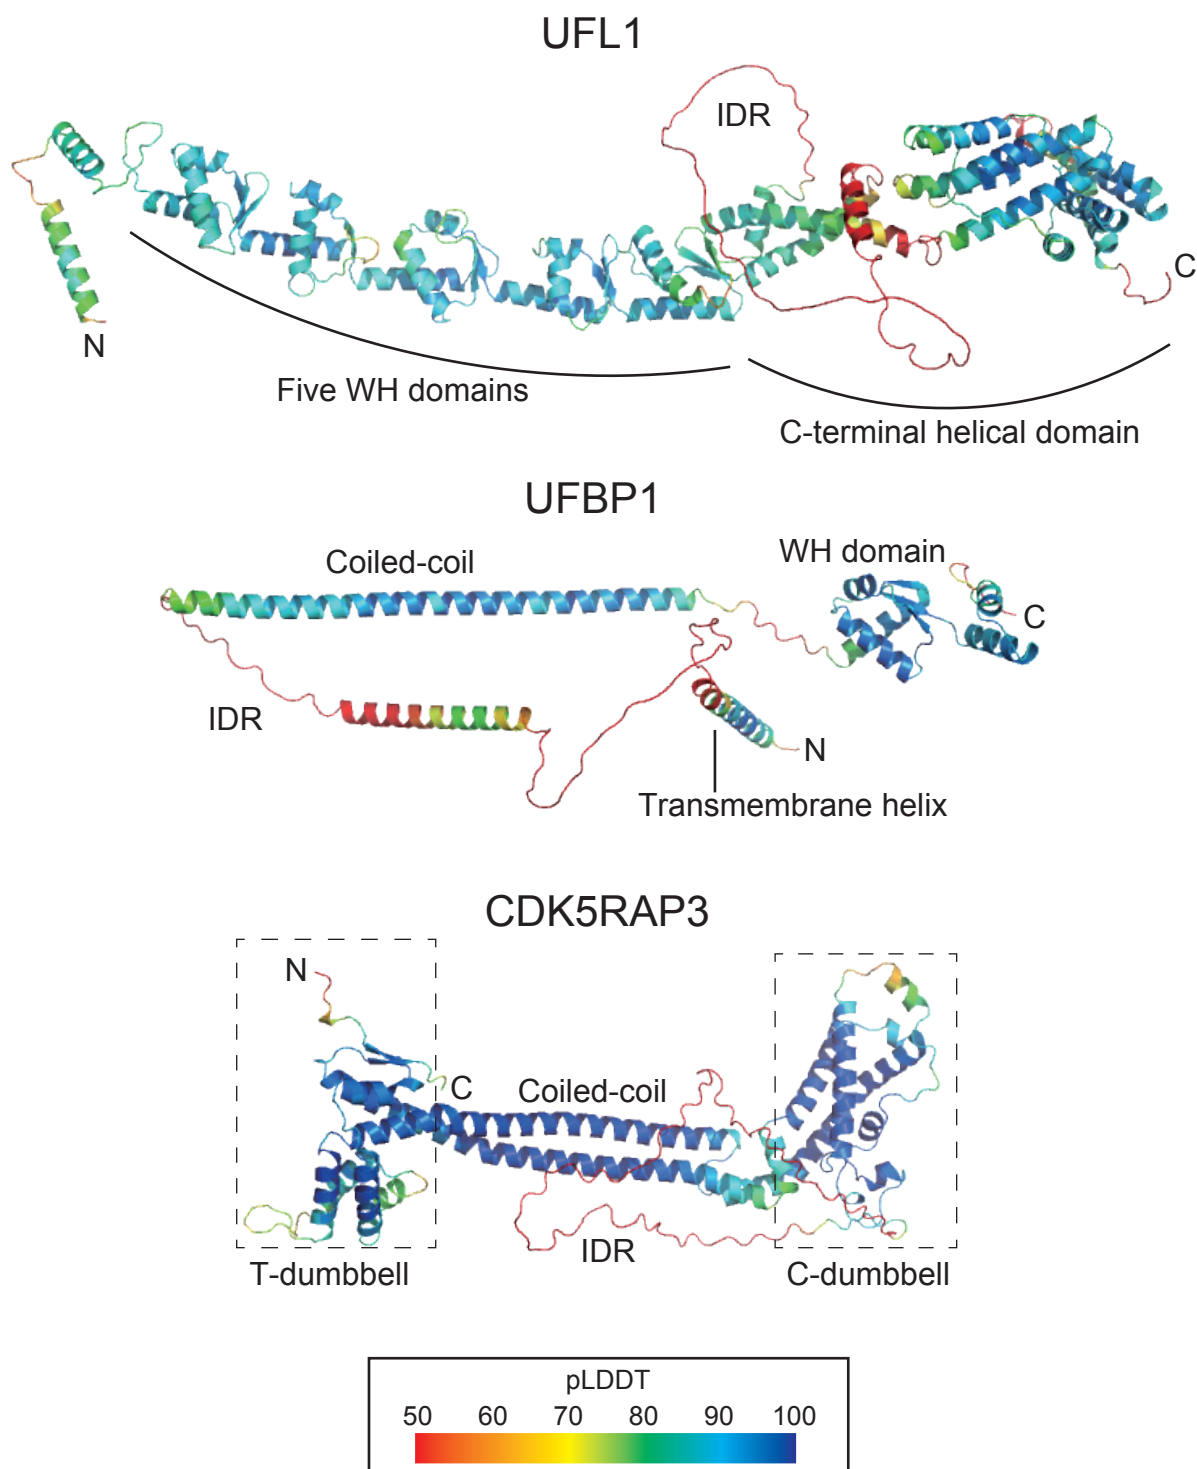

**Supplementary Figure S1 Predicted structure of each UFM1 E3 component.**

Predicted three-dimensional structures of UFL1 (UniProt Q94874), UFBP1 (UniProt Q96HY6), and CDK5RAP3 (UniProt Q96JB5) downloaded from AlphaFold Protein Structure Database. AF2 produces a per-residue confidence score (pLDDT) between 0 and 100, which is indicated by color (the color-score relationship is shown in the box; pLDDT scores between 0 and 50 are colored red).

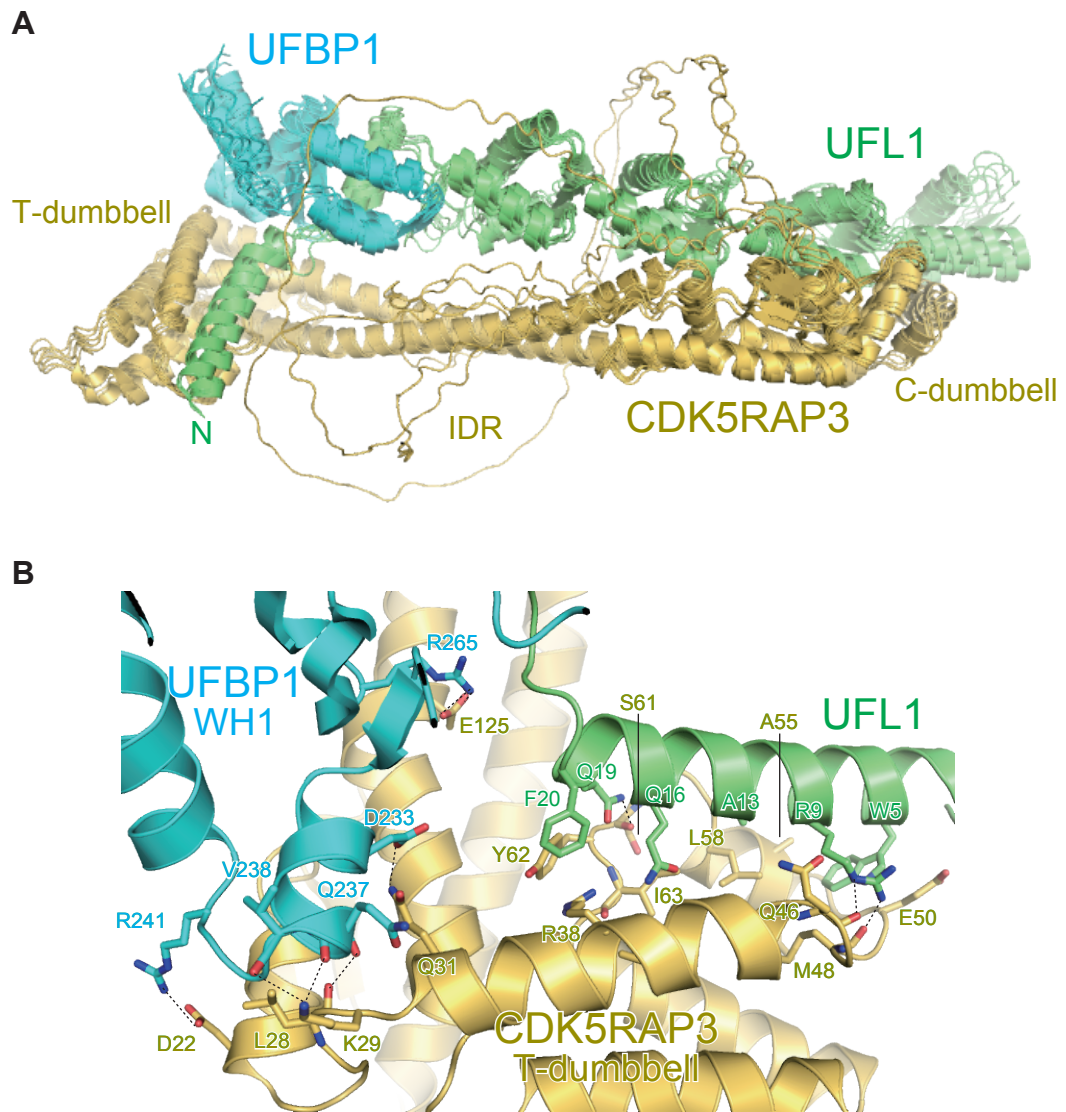

**Supplementary Figure S2 Predicted structure of the UFM1 E3 complex.**

(A) Predicted three-dimensional structure of the UFL1(1-302)-UFBP1(209-314)-CDK5RAP3 complex by AF2. The top five models are shown superimposed. (B) Binding of the T-dumbbell of CDK5RAP3 to the N-terminal helix of UFL1 and the WH1 domain of UFBP1. The side chains involved in this interaction are shown with a stick model, where oxygen and nitrogen atoms are colored red and blue, respectively. Broken lines indicate possible electrostatic interactions.

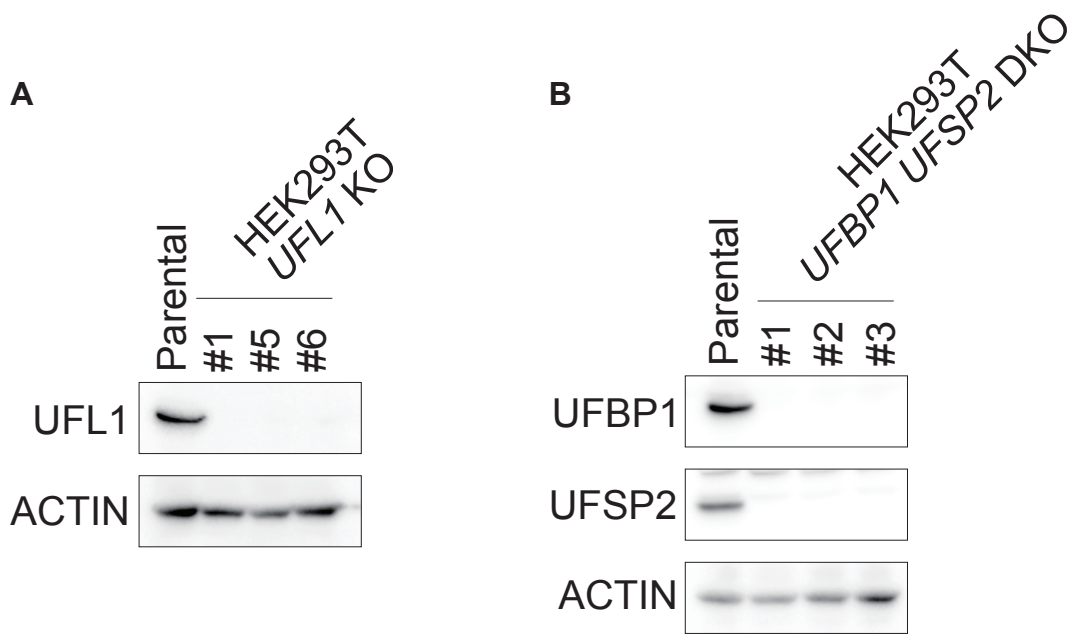

**Supplementary Figure S3 Generation of knockout cell lines.**

(A-B) Generation of *UFL1* KO (A) and *UFBP1 UFSP2* DKO (B) cell lines. The indicated genotype cell lines were lysed, then subjected to SDS-PAGE followed by immunoblot analysis with the indicated antibodies. Data shown are representative of three separate experiments.

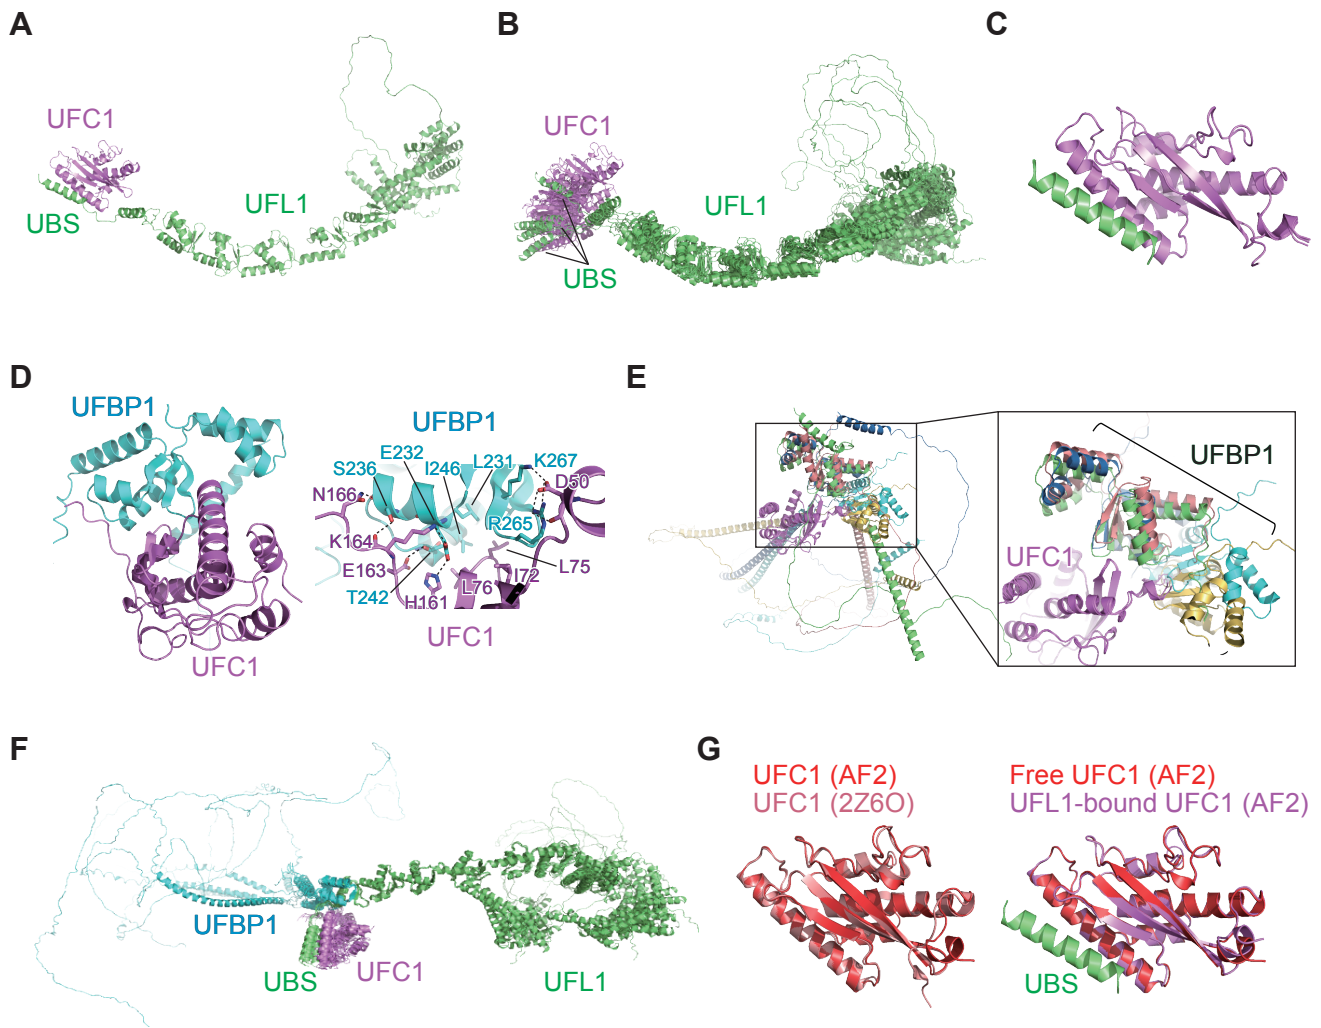

**Supplementary Figure S4 Predicted recognition mode of UFM1 E2, UFC1 to E3 subunits.**

(A) Top-scoring model of the full-length UFL1-UFC1 binary complex predicted by AF2. (B) Top five prediction models of the full-length UFL1-UFC1 binary complex are shown superimposed. (C) Structural prediction of the UFL1<sup>UBS</sup>-UFC1 binary complex. Top five models are shown superimposed. (D) The top-scoring model of the UFBP1-UFC1 binary complex predicted by AF2. The right panel shows detailed interactions, where the side chains involved in the interaction are shown with a stick model. Oxygen and nitrogen atoms are colored red and blue, respectively. Broken lines indicate possible electrostatic interactions. (E) The top five models of the UFBP1-UFC1 binary complex are shown superimposed. (F) Structural prediction of the UFL1-UFBP1-UFC1 ternary complex. The top five models are shown superimposed. (G) Comparison of the predicted structure of UFC1 (AF2) with the crystal structure (2Z6O) (left). Comparison of the predicted structure of free UFC1 and UFL1<sup>UBS</sup>-bound UFC1 (right).

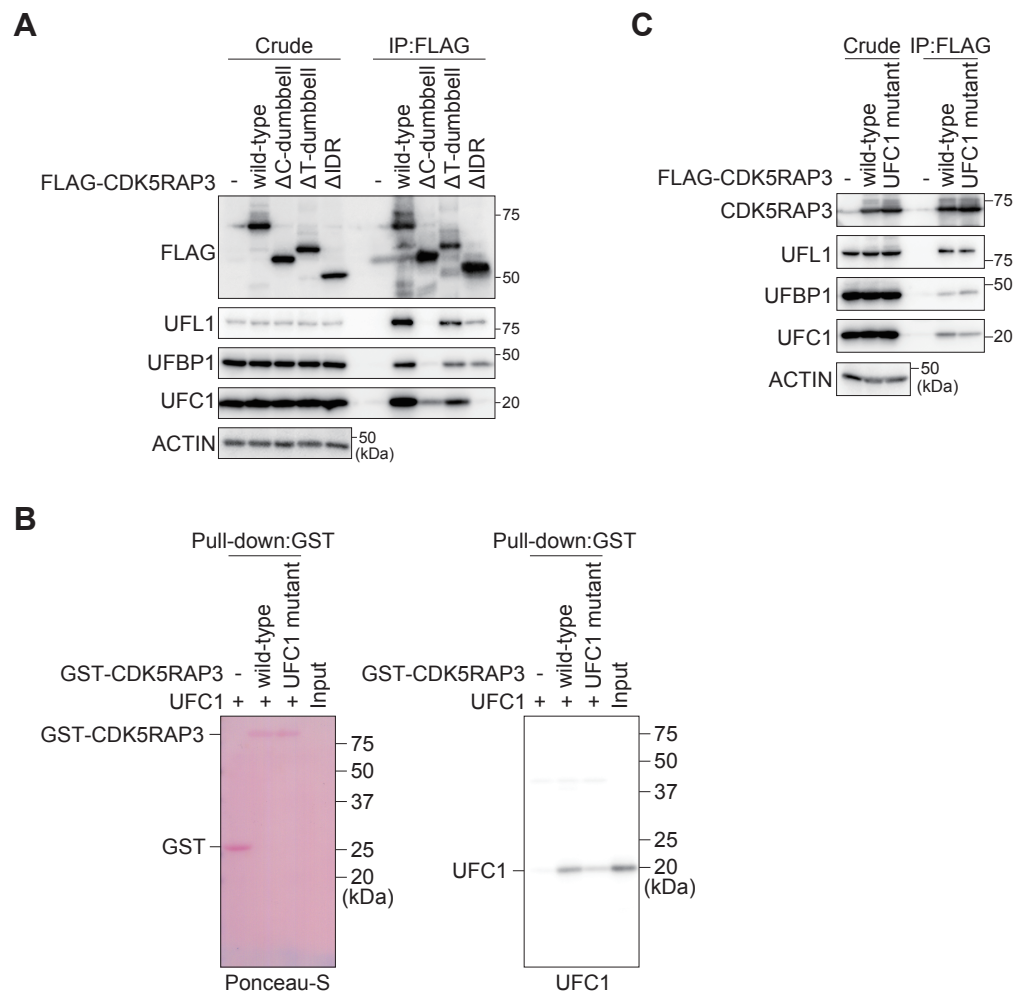

### Supplementary Figure S5 CDK5RAP3 interacts with UFC1.

**(A)** The IDR of CDK5RAP3 is required for its interaction with UFC1. CDK5RAP3 mutants lacking the C-dumbbell ( $\Delta$ C-dumbbell), T-dumbbell ( $\Delta$ T-dumbbell), and IDR ( $\Delta$ IDR) were transfected into *CDK5RAP3*-deficient HEK293T cells. Forty-eight hours after transfection, cells were lysed and immunoprecipitated with anti-FLAG-M2 gel; then, the immunoprecipitants were subjected to immunoblot analysis with the indicated antibodies. **(B)** Direct interaction of CDK5RAP3 with UFC1. GST, GST-CDK5RAP3, or GST-CDK5RAP3<sup>I267A W269A</sup> (CDK5RAP3<sup>UFC1 mutant</sup>) was immobilized on glutathione Sepharose column. The Sepharose and recombinant UFC1 were incubated, and the supernatant and pulled-down products were then subjected to SDS-PAGE followed by immunoblotting with anti-UFC1 antibody. Data shown are representative of three separate experiments. **(C)** Biochemical characterization of the binding between CDK5RAP3 and UFC1. FLAG-tagged wild-type CDK5RAP3 or CDK5RAP3<sup>UFC1 mutant</sup> was transfected into *CDK5RAP3*-deficient HEK293T cells. Forty-eight hours after transfection, cells were lysed and immunoprecipitated with anti-FLAG-M2 gel; then, the immunoprecipitants were subjected to immunoblot analysis with the indicated antibodies. Data shown are representative of three separate experiments.

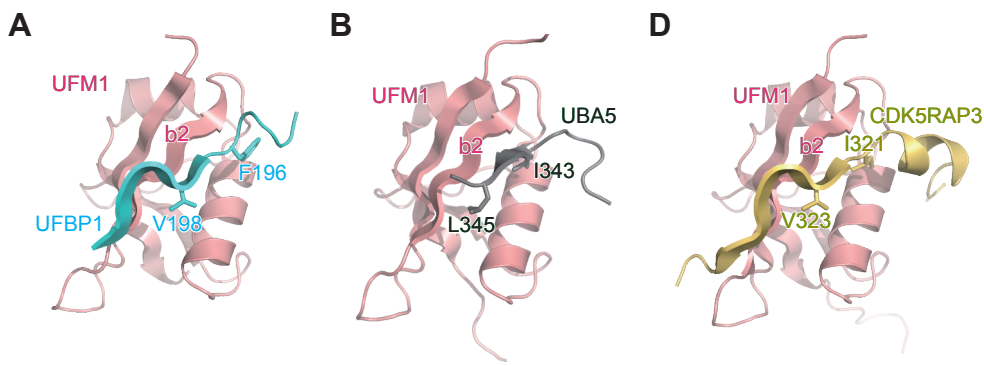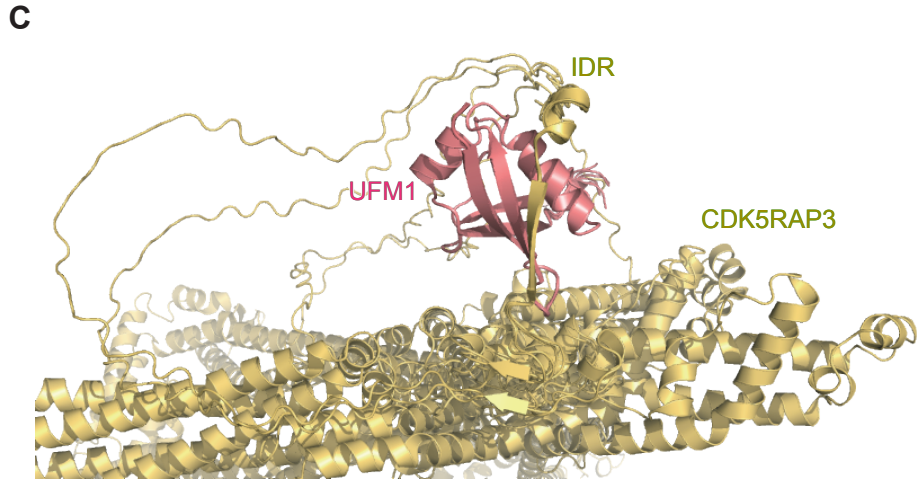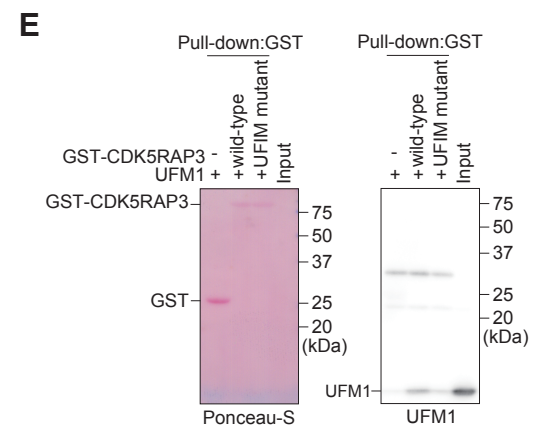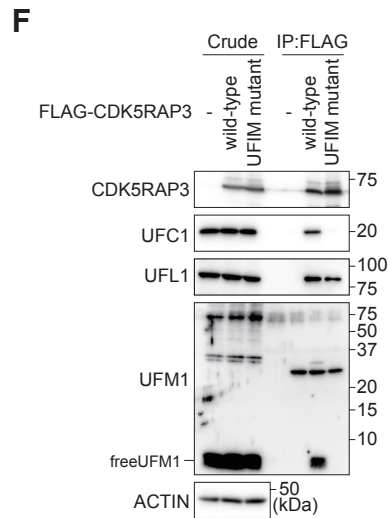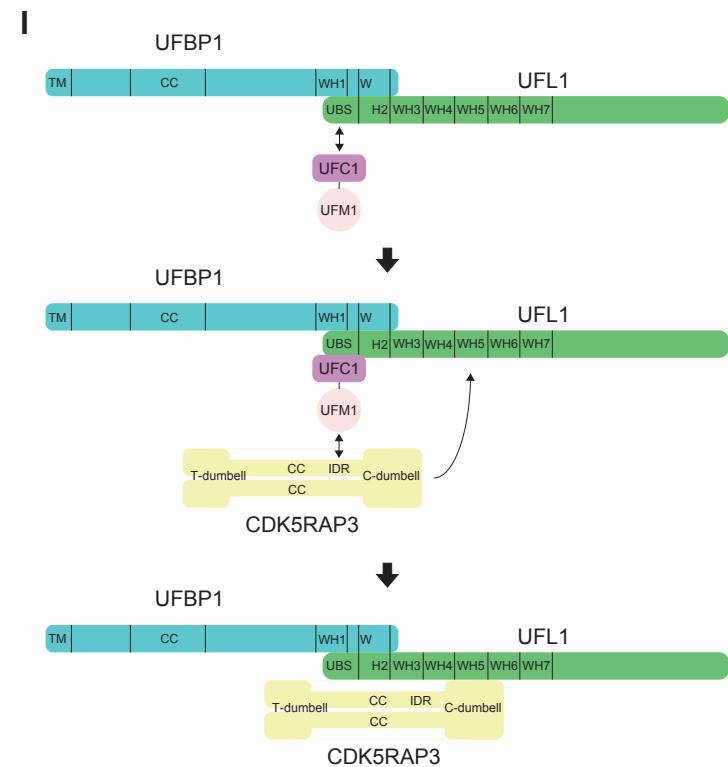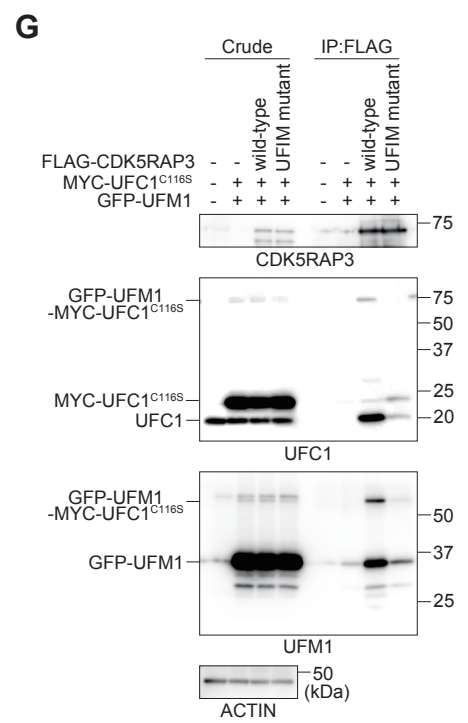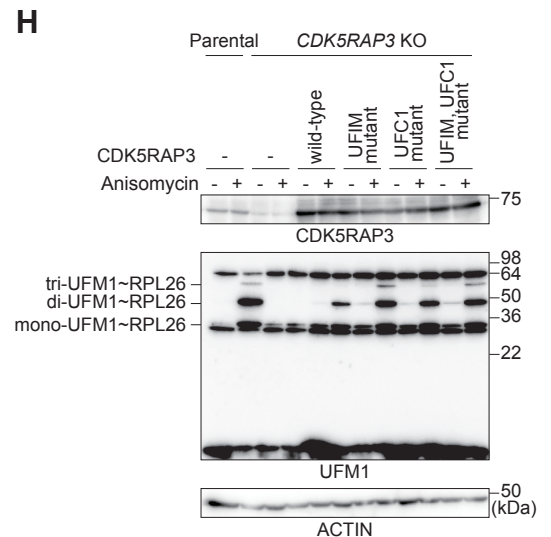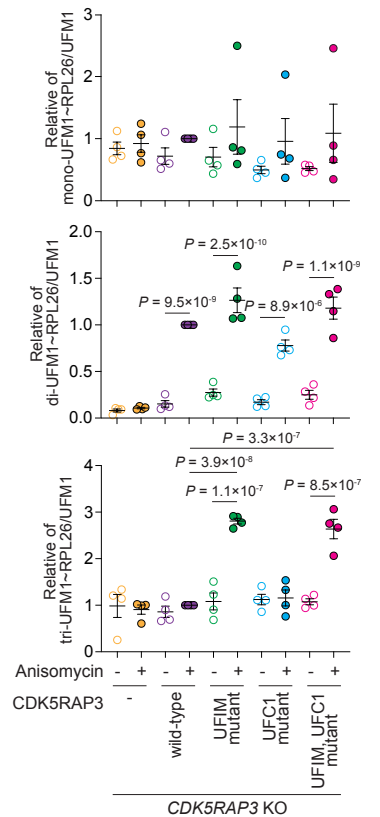

**Supplementary Figure S6 CDK5RAP3 interacts with UFM1-charged UFC1.**

**(A)** Crystal structure of UFBP1<sup>UFIM</sup> bound to UFM1 (PDB 7W3N). **(B)** Crystal structure of UBA5<sup>UFIM</sup> bound to UFM1 (PDB 5HKH). **(C)** Structural prediction of the CDK5RAP3-UFM1 binary complex. The top five models are shown superimposed. **(D)** Close-up view of the interaction between CDK5RAP3<sup>UFIM</sup> and UFM1 in the top-scoring model. **(E)** Direct interaction of CDK5RAP3 with UFM1. GST, GST-CDK5RAP3, or GST-CDK5RAP3 UFIM mutant (CDK5RAP3<sup>UFIM mutant</sup>) was immobilized on glutathione Sepharose column. The Sepharose and recombinant UFM1 were incubated, and the supernatant and pulled-down products were then subjected to SDS-PAGE followed by immunoblotting with anti-UFM1 antibody. Data shown are representative of three separate experiments. **(F-G)** Biochemical characterization of the binding between CDK5RAP3 and UFM1. **(F)** FLAG-tagged wild-type CDK5RAP3 or CDK5RAP3<sup>UFIM</sup> mutant was transfected into *CDK5RAP3*-deficient HEK293T cells. **(G)** FLAG-tagged wild-type CDK5RAP3 or CDK5RAP3<sup>UFIM mutant</sup>, together with MYC-tagged UFC1<sup>C116S</sup> and GFP-tagged UFM1, were transfected into *CDK5RAP3*-deficient HEK293T cells. Forty-eight hours after transfection, cells were lysed and immunoprecipitated with anti-FLAG-M2 gel; then, the immunoprecipitants were subjected to immunoblot analysis with the indicated antibodies. Data shown are representative of three separate experiments. **(H)** The role of the interaction between CDK5RAP3 with UFM1 on RPL26 ufmylation. Wild-type CDK5RAP3 and UFM1-interaction defective (CDK5RAP3<sup>UFIM mutant</sup>), UFC1-interaction defective (CDK5RAP3<sup>UFC1 mutant</sup>), and double mutant (CDK5RAP3<sup>UFIM UFC1 mutant</sup>) CDK5RAP3 were transfected in *CDK5RAP3*-deficient HEK293T cells. Forty-eight hours after transfection, the cells were treated with 200 nM anisomycin (Ans) for 1 h and then lysed. The cell lysates were subjected to SDS-PAGE followed by immunoblot analysis with the indicated antibodies. Bar graphs show the results of quantitative densitometric analysis of ufmylated RPL26 (mono-, di-, and tri-ufmylated RPL26) relative to free RPL26 (n = 4). Data are means ± s.e. Statistical analysis was performed by Welch' s *t*-test. Data shown are representative of three separate experiments. **(I)** Schematic model of step-wise formation of a five-component complex consisting of the UFBP1-UFL1 E3 complex, UFC1-UFM1 intermediate, and CDK5RAP3.



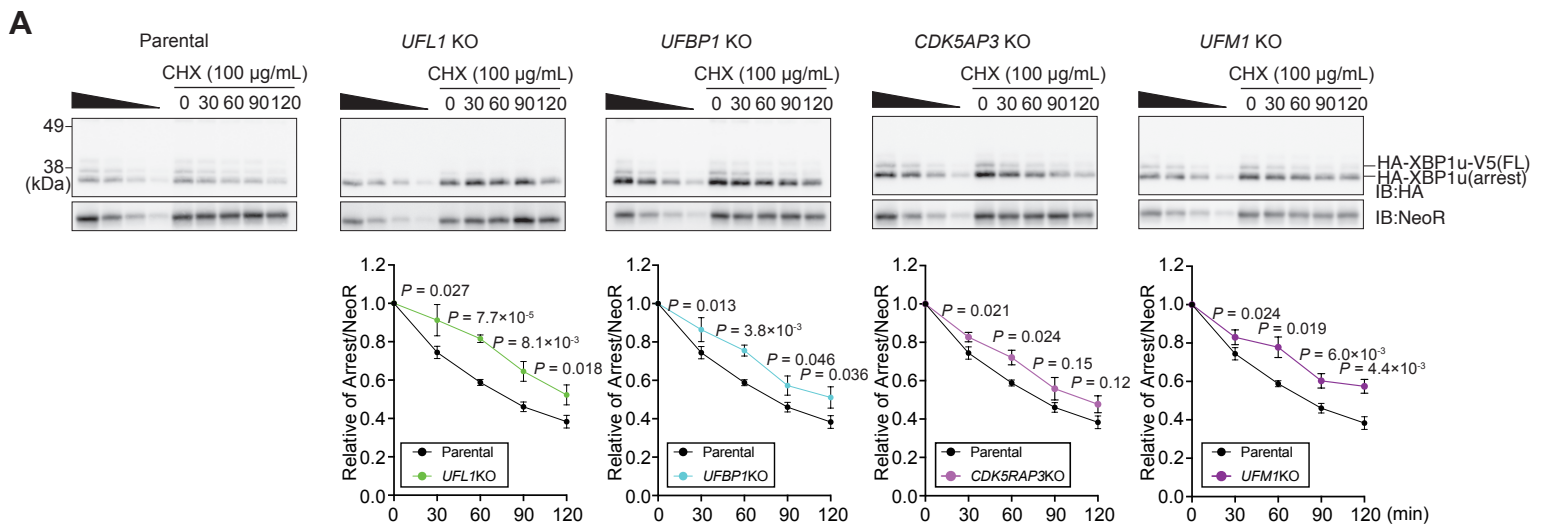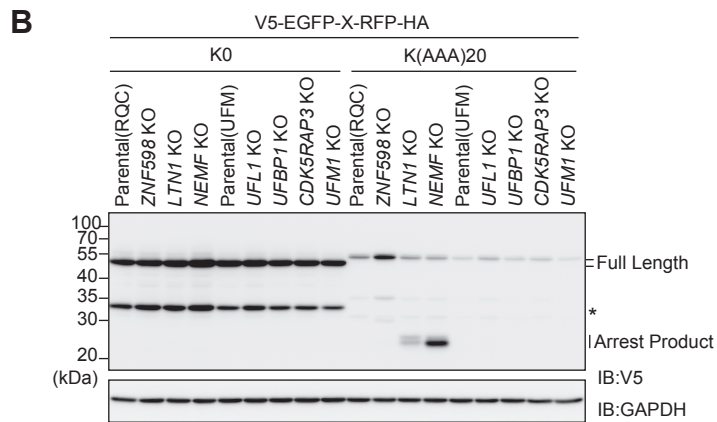

**Supplementary Figure S7 The UFM1 E3 complex is required for ER-RQC but not cytosolic-RQC.**

**(A)** UFM1 E3 components are indispensable for ER-RQC. Parental HEK293T cells and indicated KO cells were transfected with the *HA-XBP1u-V5* plasmid. Twenty-four hours after transfection, the cells were treated with cycloheximide (100  $\mu$ g/mL) for 0, 30, 60, 90, or 120 min, and then lysed. After the cell lysates were treated with RNase, the samples were subjected to neutral PAGE followed by immunoblot analysis with indicated antibodies. Line graphs show the results of quantitative densitometric analysis of arrest product relative to NeoR ( $n = 5$ ). Data are means  $\pm$  s.e. Statistical analysis was performed by Welch' s *t*-test. Data shown are representative of three separate experiments. **(B)** UFM1 E3 components are dispensable for cytosolic RQC. The indicated KO cells expressed the *V5-EGFP-K(AAA)0* or *20-RFP-HA* reporter. The cell lysates were subjected to SDS-PAGE followed by western Blotting with antibodies against V5 and GAPDH. The results shown are representative of three separate experiments.
